# Supplementary material for: Fabrication of ZnO nanoplates for visible light-induced imaging of living cells
Source: Royal Society of Chemistry journal article supplement (doi:10.1039/c4tb00248b), 2014-01-01
Supplement: c4tb00248b1.pdf [file c4tb00248b1.pdf]

## Supplementary Information

### Fabrication of ZnO nanoplates for visible light-induced imaging of living cell

By Jooran Lee<sup>a</sup>, Joon Sig Choi<sup>b</sup> and Minjoong Yoon\*<sup>a</sup>

<sup>a</sup>Molecular/Nano Photochemistry and Photonics Lab, Department of Chemistry, Chungnam National University, Daejeon 305-764, South Korea, <sup>b</sup>Department of Biochemistry, College of Natural Sciences, Chungnam National University, Daejeon 305-764, South Korea, \*e-mail: [mjyoon@cnu.ac.kr](mailto:mjyoon@cnu.ac.kr)

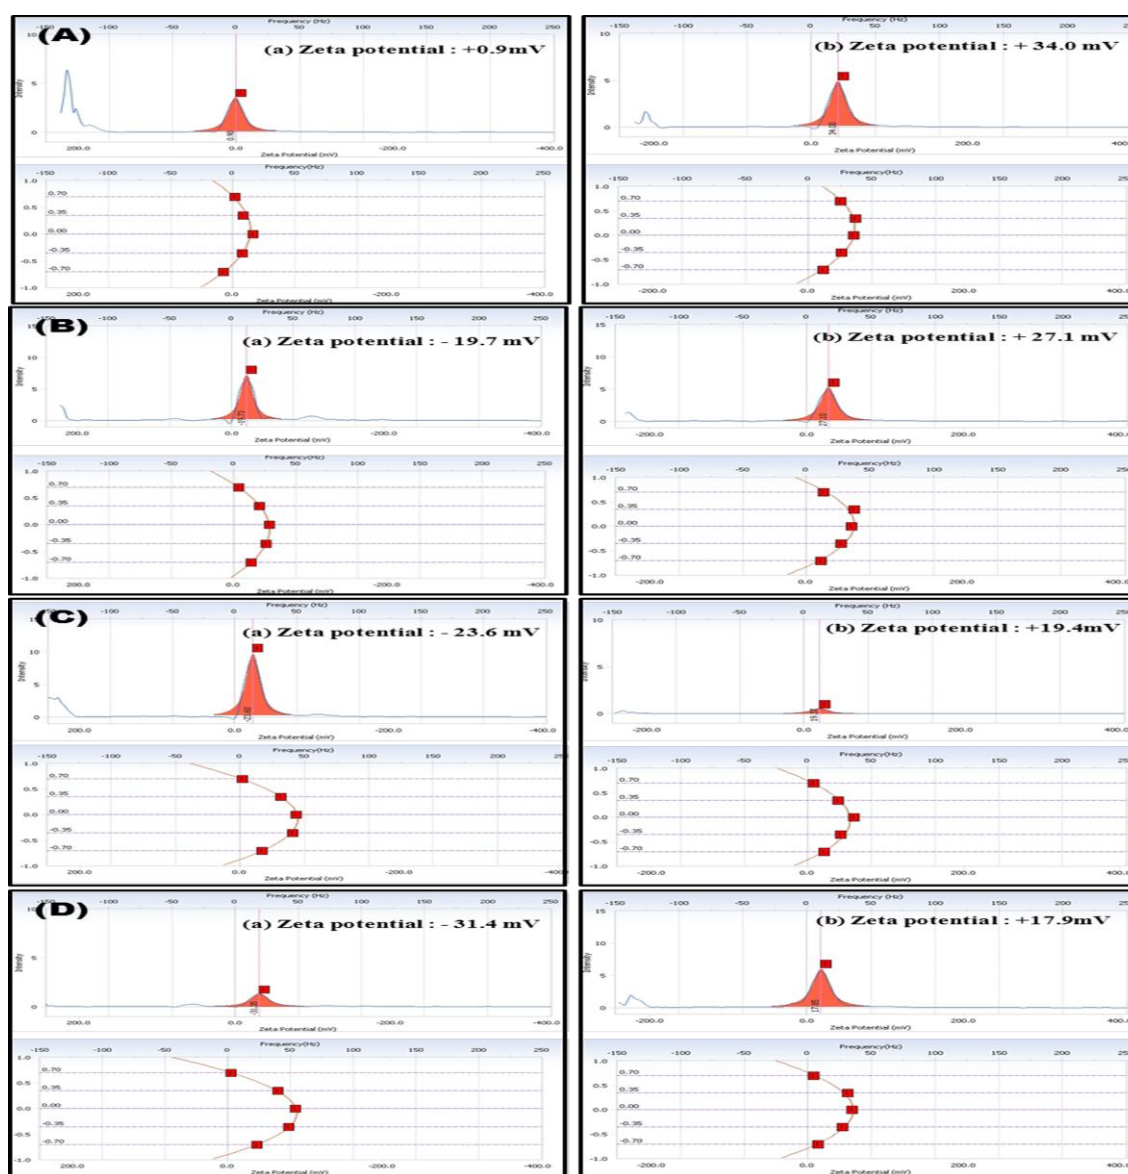

Figure S1. Surface charge or zeta potential of (a) ZnO NPIs and (b) APTES-ZnO NPIs were measured in deionized water at (A) pH 4.2, (B) pH 7.0, (C) pH 7.8 (in buffer) and (D) pH 10.1 by laser doppler velocimetry (LDV).

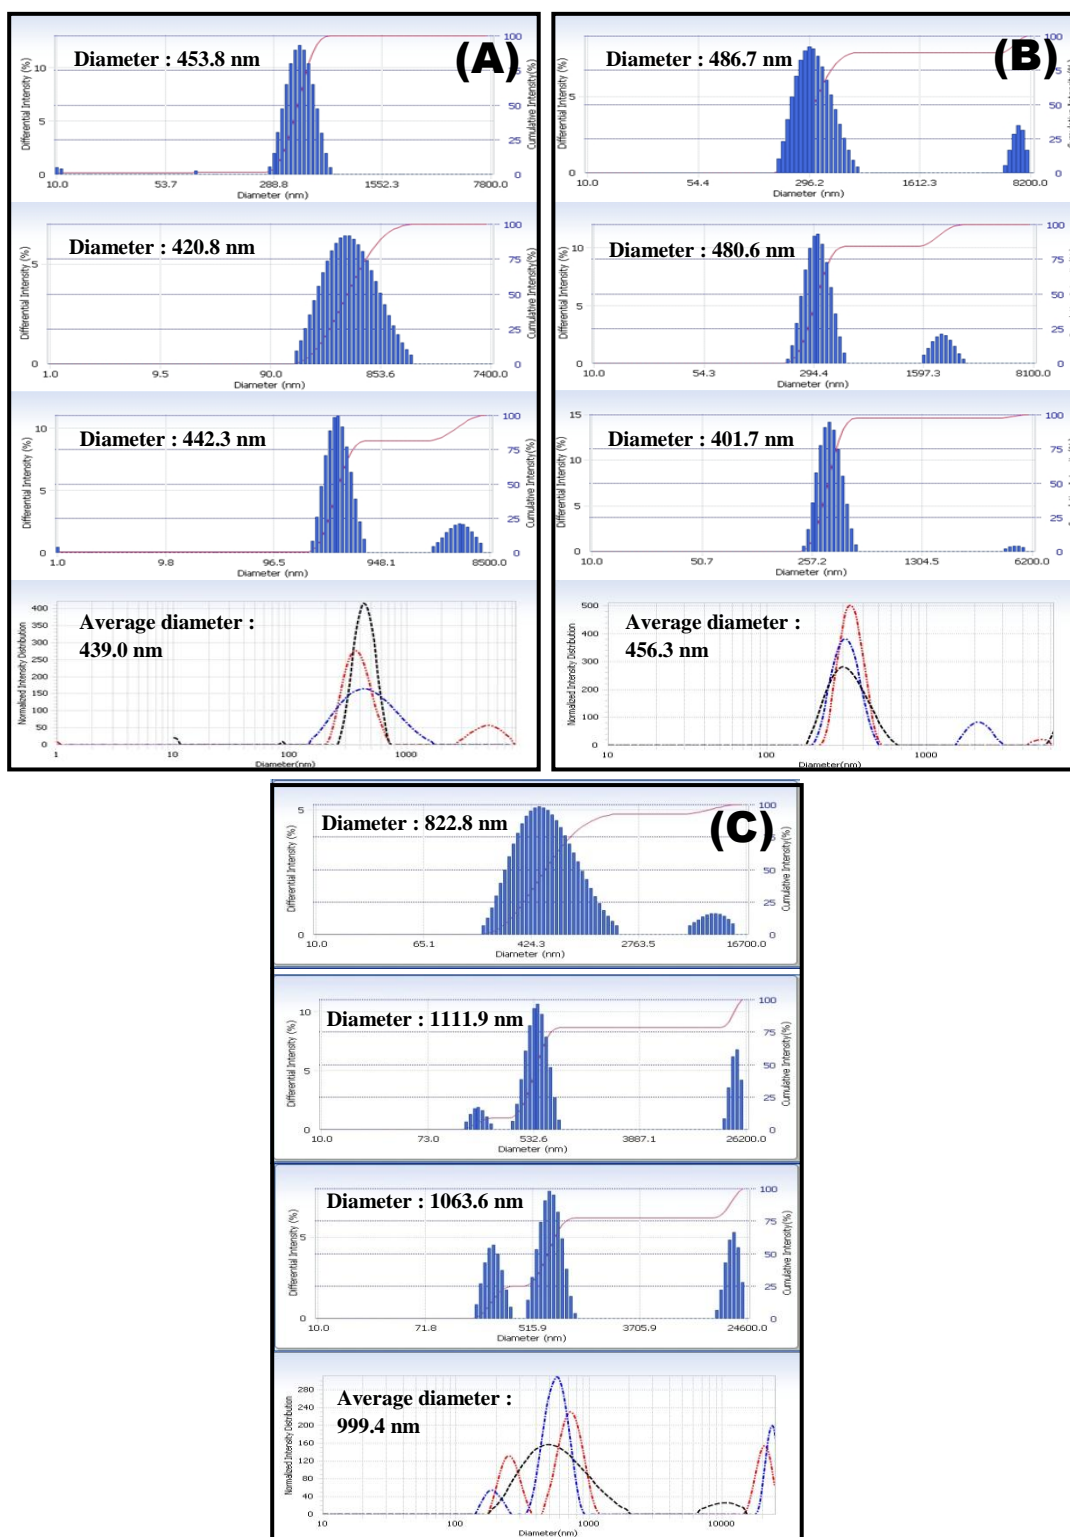

Figure S2. Sizes of (A) ZnO NPLs, (B) APTES-ZnO NPLs and (C) ZnO nanoparticles in deionized water at pH 7.0 were measured by dynamic light scattering (DLS).

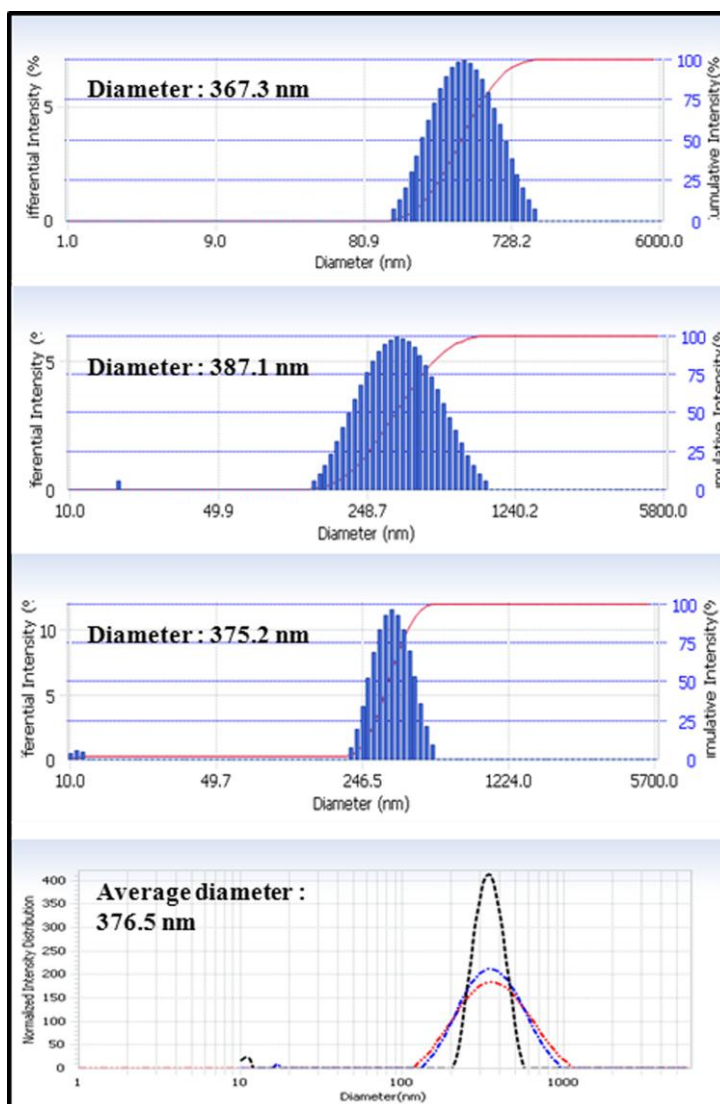

Figure S3. Sizes of APTES-ZnO NPLs in cell culture medium at pH 7.2 were measured by dynamic light scattering (DLS).

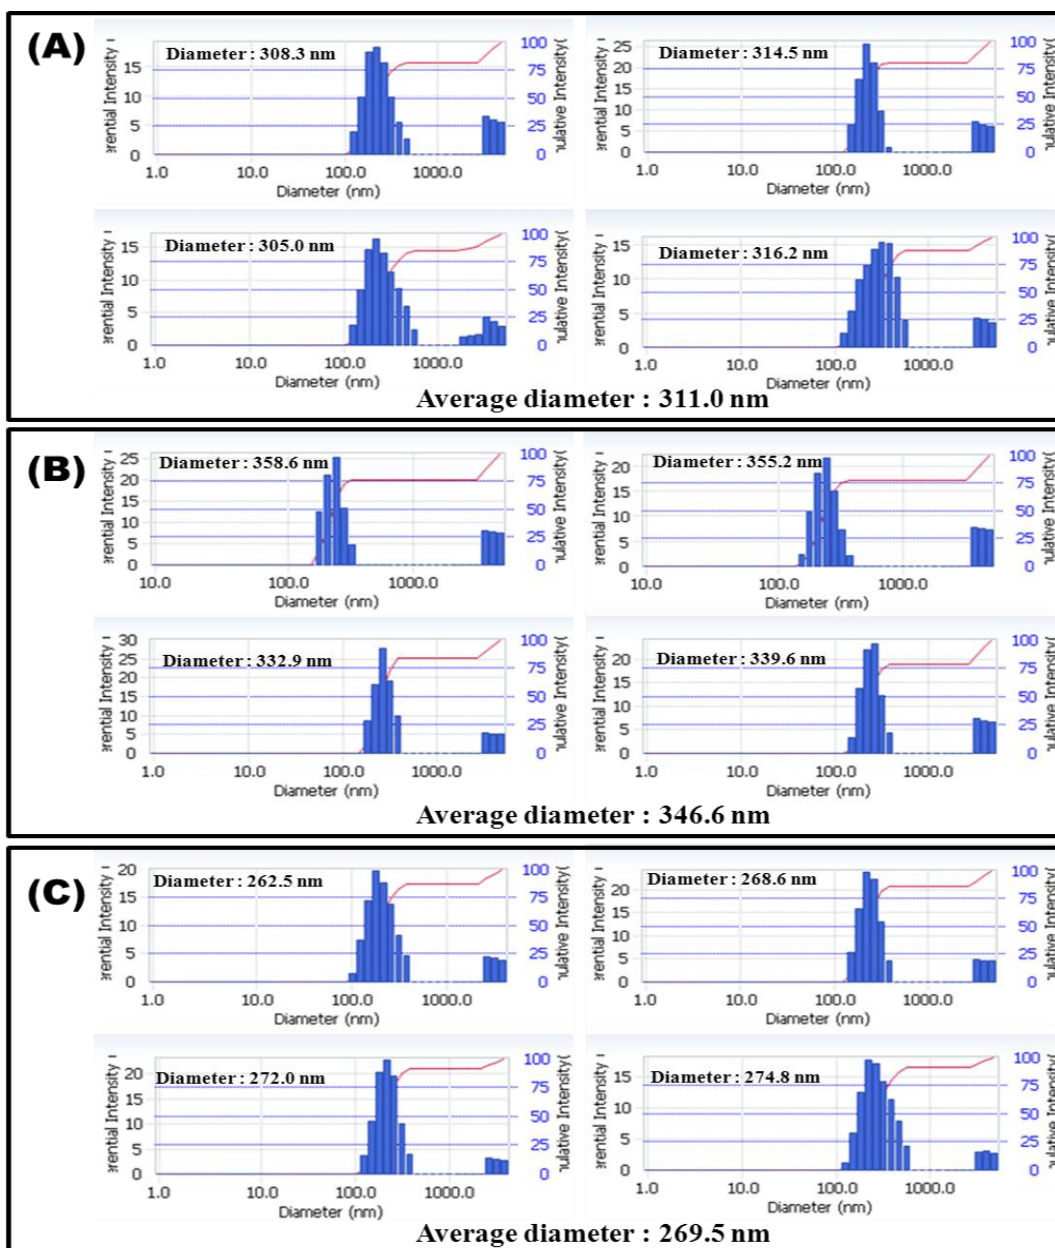

Figure S4. Sizes of ZnO NPs in deionized water at (A) pH 4.2, (B) pH 7.8 (in buffer) and (C) pH 10.1 were measured by dynamic light scattering (DLS).

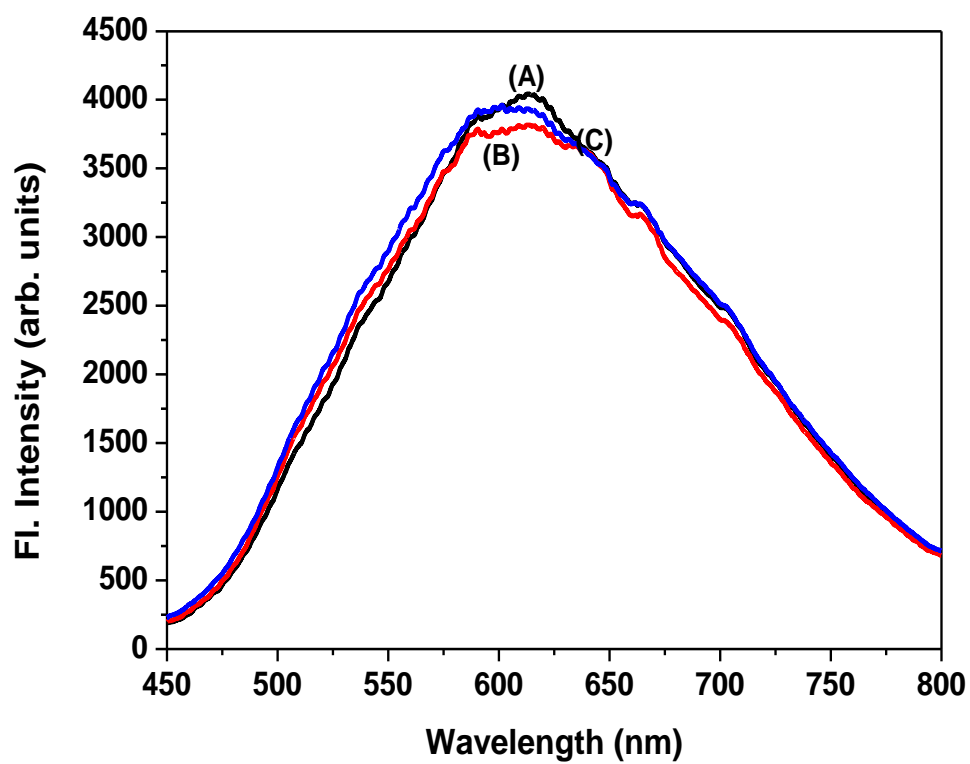

Figure S5. Fluorescence emission spectra of the APTES-ZnONPIs in deionized water at pH 7.0 after different storage times at room temperature under visible light of 410nm: (A) the fresh sample, (B) after 1 day and (C) after 7 days

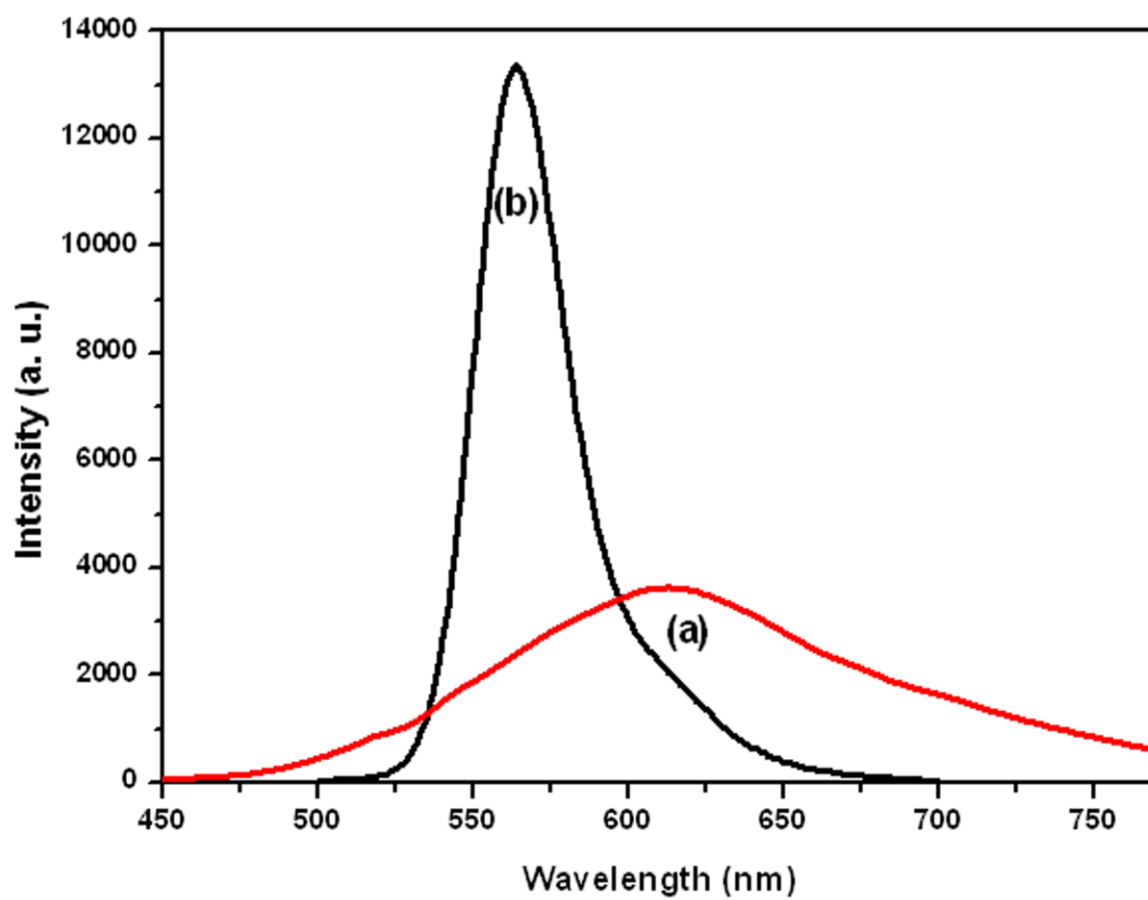

Figure S6. Fluorescence emission spectra of (a) the APTES-ZnO NPIs versus (b) the standard rhodamin B ethanol solution (QY = 65%) when evaluating the quantum yield of the APTES-ZnO NPIs colloids (QY = 53%).

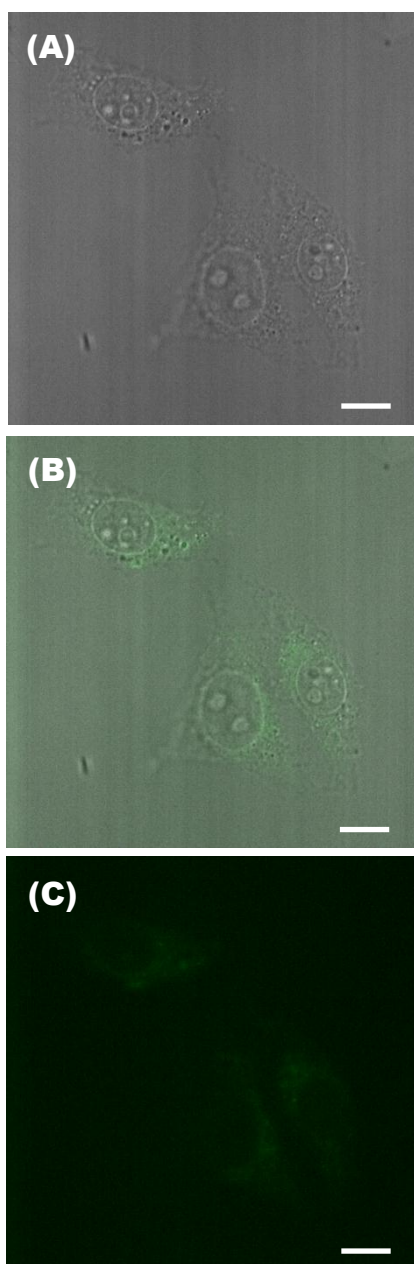

Figure S7. (A) DIC image and (B) merge image of HeLa. (C) Confocal auto-fluorescence image of HeLa cell without ZnO NPIs. The sizes of scale bars are 10  $\mu\text{m}$ .

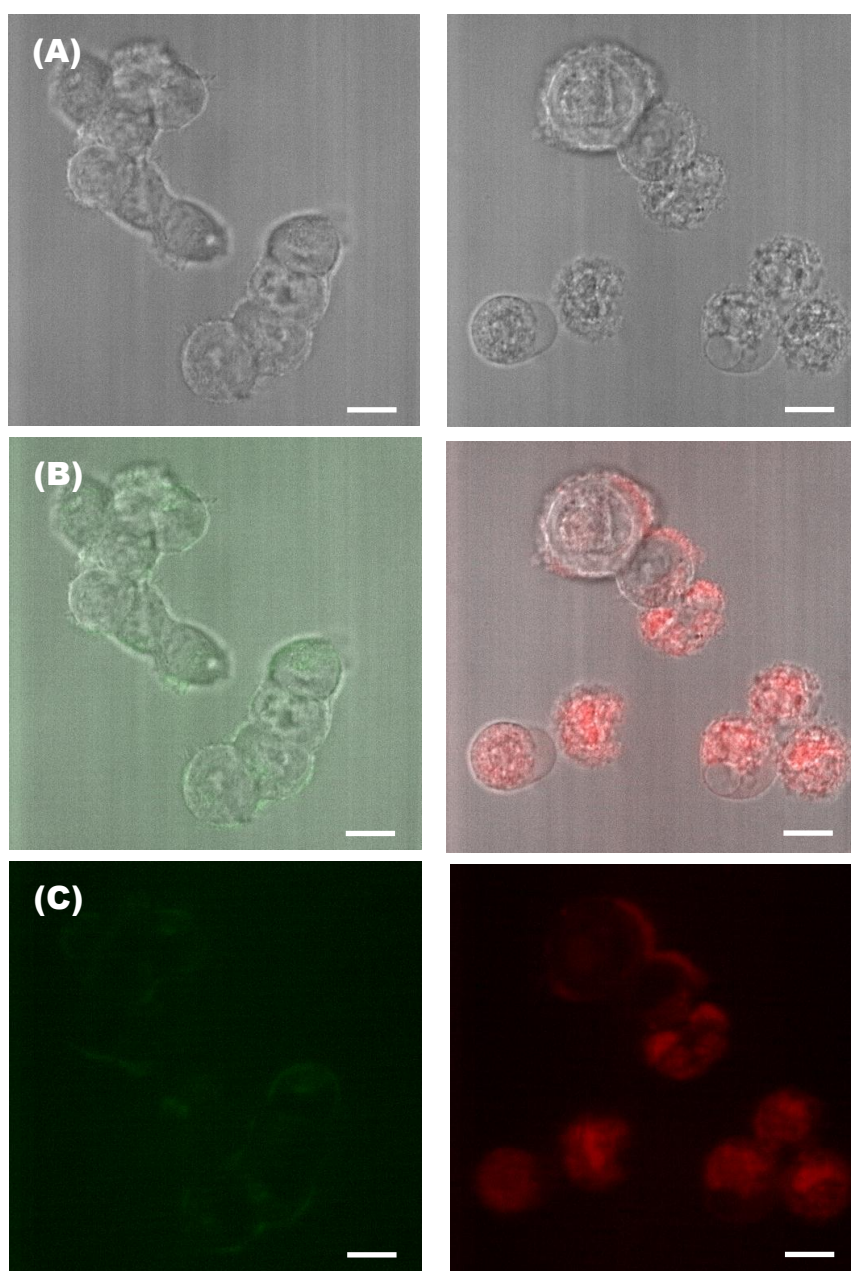

Figure S8. (A) DIC images, (B) merge images and (C) Confocal auto-fluorescence image of HEK 293 cells (left) and fluorescence image of HEK 293 cell containing APTES-ZnO NPs (right). The sizes of scale bars are 10  $\mu\text{m}$ .
